# Supplementary material
Source: Research Square preprint supplement (doi:10.21203/rs.3.rs-9173952/v1)
Supplement: Supplementary file 1 [file 585aed8830483829851633ce.docx]

**Supplementary Information**

**Fig. S1** ACLY and FASN expression in residual tumors. Expression according to recurrence in patients with **(A)** HER2+ and **(B)** triple-negative breast cancer (TNBC). The difference was not statistically significant. ACLY, ATP citrate lyase; FASN, fatty acid synthase; HER2+, human epidermal growth factor receptor 2 positive.

**Fig. S2** ACLY translocation in MCF7 cells and basal expression check between parent and hormone deprivation cells. **(A)** ACLY was suppressed using two siRNAs targeting the citrate binding site in MCF7 cells, and a western blot assay was performed with c-MYC, FASN, ACLY, and β-actin antibodies. **(B)** MCF7 cells were separated into the cytosol and nucleus, and western blot assays were performed with c-MYC, ACLY, topo-1, and ɑ-tubulin antibodies. The right panel is the bar graph of the western blot data. **(C)** The hormone resistance of MCF7-LTED cells was confirmed by determining cell viability following estradiol treatment. **(D)** The qRT-PCR was performed with *MYC*, *CPT1A*, *FASN*, and *ACLY* primers in MCF7-parent and LetR cells. The statistical significance of the difference was analyzed using the student’s t-test (*p < 0.05 and ***p < 0.001). **(E)** The drug resistance of MCF7-LetR cells was confirmed by determining the cell viability after 10 µM letrozole treatment. The statistical significance of the difference was analyzed using the student’s t-test (***p < 0.001). **(F)** ACLY was suppressed using #1 siRNAs in MCF7-LetR cells, and a western blot assay was performed with c-MYC, FASN, ACLY, and β-actin antibodies. **(G)** The mitochondrial oxidative respiration was identified in MCF7-Parent and -LTED cells, T47D-Parent and -LTED, and MCF7-parent and -LetR cells. ACLY, ATP citrate lyase; siRNA, small interfering RNA; MYC, myelocytomatosis oncogene; c-MYC; cellular MYC; FASN, fatty acid synthase; topo-1, type I topoisomerase; qRT-PCR, quantitative reverse transcription polymerase chain reaction; CPT1A, carnitine palmitoyltransferase 1A; LetR, letrozole-resistant; LTED, long-term estrogen deprivation.

**Fig. S3** Molecular interactions affected mitochondrial oxidative respiration and metabolites, and NDI has a synergistic effects with etomoxir. **(A)** siNC and siACLY were transfected, and mitochondrial oxidative respiration was identified in MCF7 and MCF7-LTED cells. pcDNA3.0 and ACLY WT plasmids were transfected into MCF7 cells, and a mitochondria oxidative respiration assay was performed. **(B)** Metabolites in glycolysis, TCA cycle, and pentose phosphate were measured in MCF7 parent and LTED cells. **(C)** Protein transfection in the FAO assay of Fig. 4E was confirmed using western blot assay. **(D)** The cytotoxicity assays were performed following treatment with two known ACLY inhibitors, SB-204990 and ETC-1002 (bempedoic acid) for 24 h, in MCF7 parent and LTED cells. **(E)** The effect of NDI in MCF7-parent and LTED cells was confirmed at a drug concentration of 5 µM in a time-dependent manner. **(F)** MCF7 LTED cells were treated with NDI, and a western blot assay was performed with p-c-MYC (S32), p-ACLY (S455), ACLY, and β-actin antibodies. The bands were calculated per β-actin protein amount and are shown in bar graphs (Right panels). **(G)** MCF7-LetR cells were treated with NDI and Eto to identify the synergistic effect. The combination index was calculated using Calcusyn software (Right panel). NDI, NDI-091143; Eto, etomoxir; ACLY, ATP citrate lyase; LTED, long-term estrogen deprivation; WT, wild-type; TCA, tricarboxylic acid; FAO, fatty acid oxidation; MYC, myelocytomatosis oncogene; c-MYC; cellular MYC; p-c-MYC, phosphorylated c-MYC; MCF7-LetR, letrozole-resistant MCF7 cell line, si, small interfering.
