# Supplementary material
Source: Research Square preprint supplement (doi:10.21203/rs.3.rs-9173952/v1)

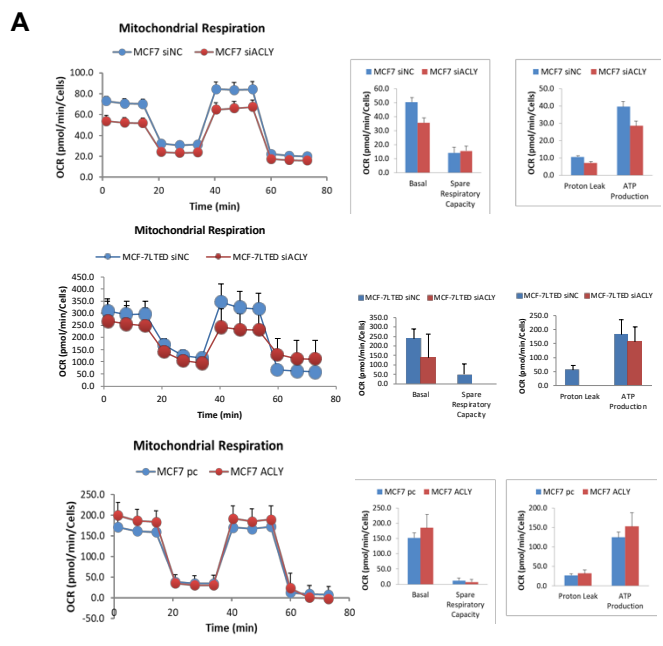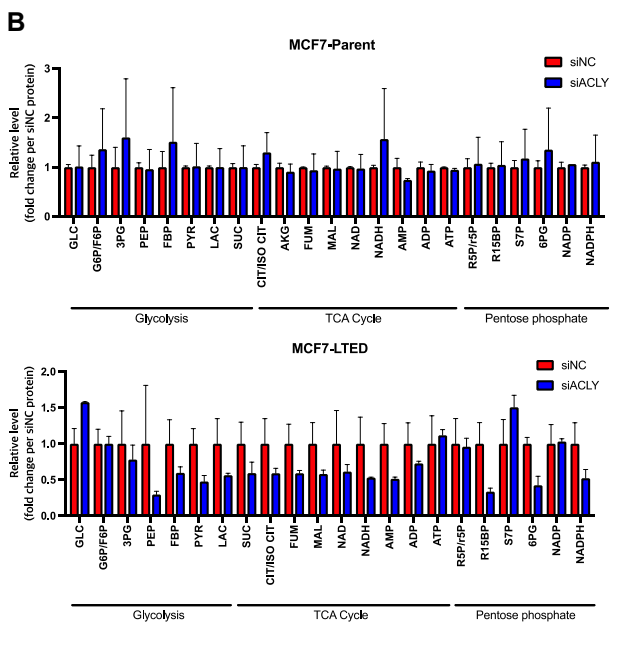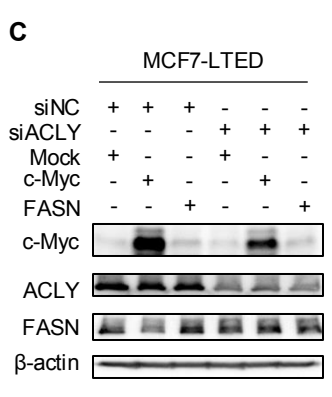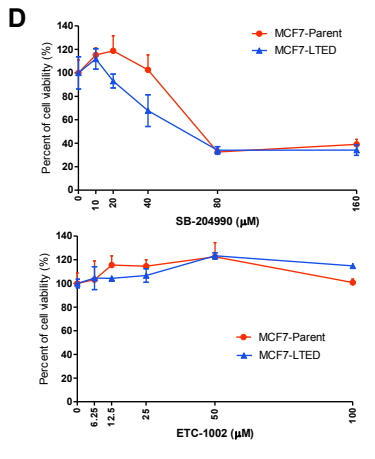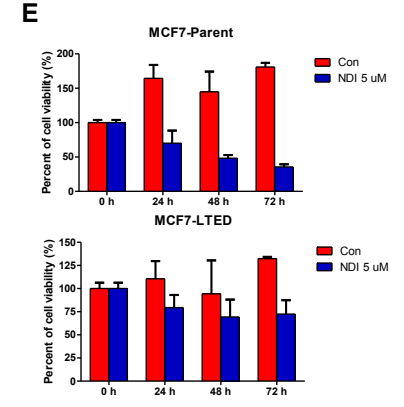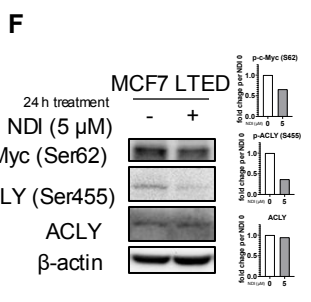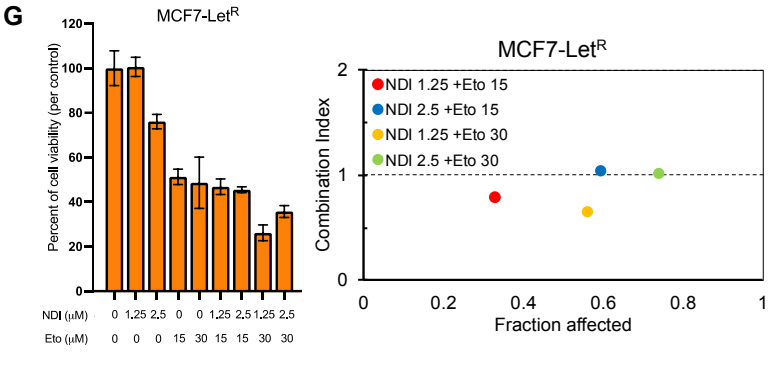

Supplement: Supplementary file 2 [file b2bd43b0669c0eb4c81bacc9.pdf]

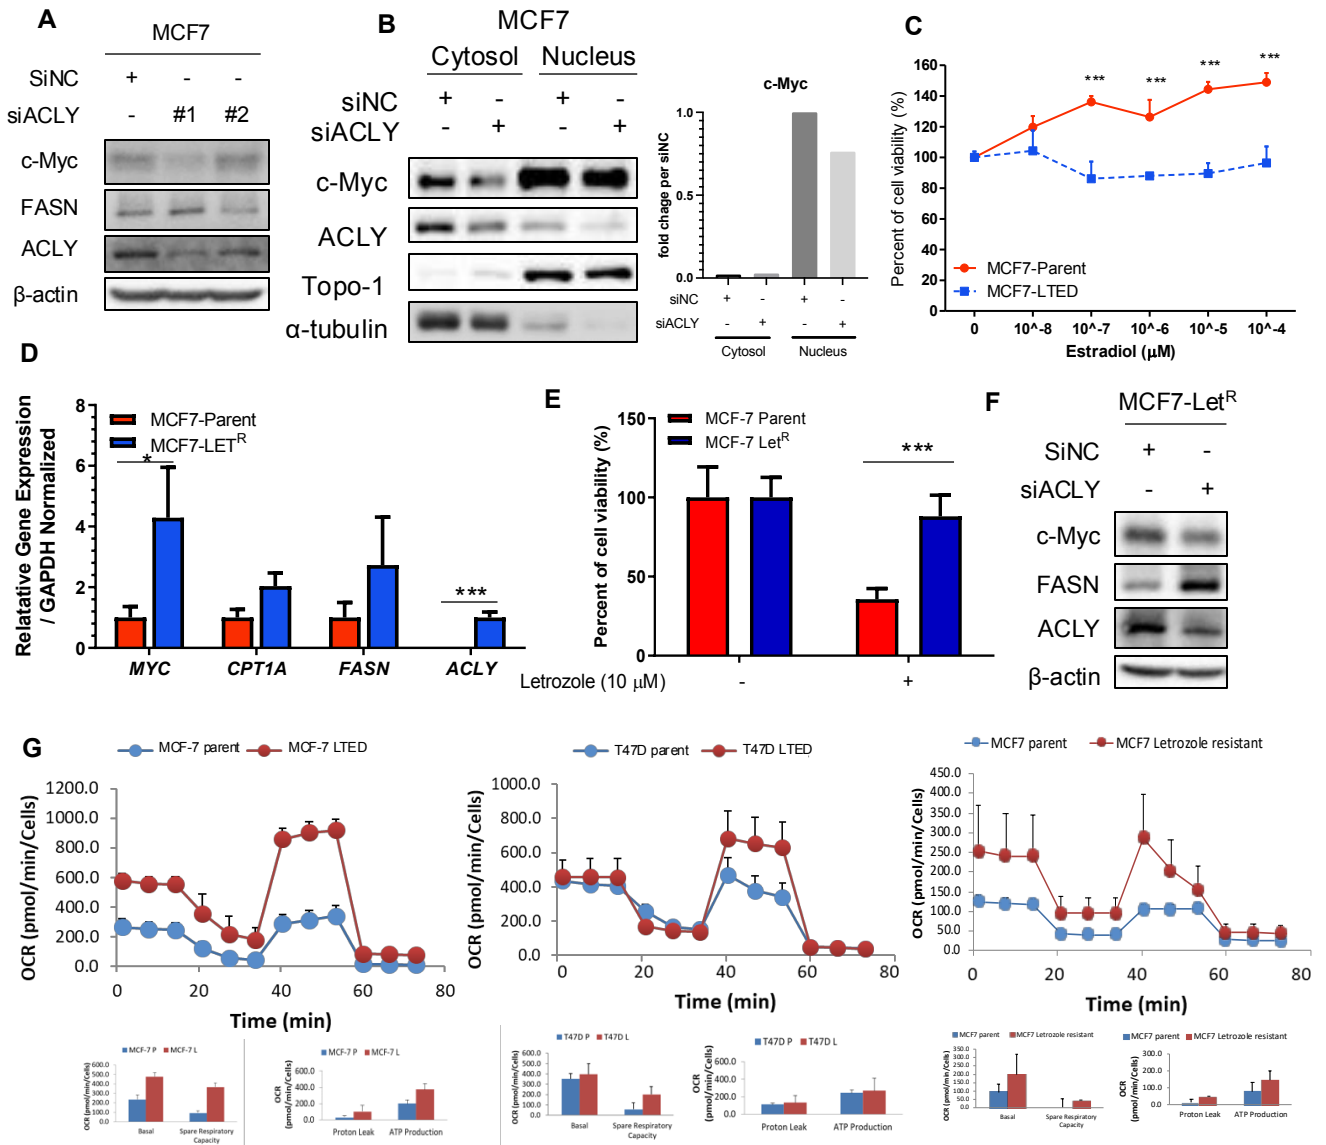

Supplement: Supplementary file 3 [file cf79a89a3955ec1b807c2e7b.pdf]

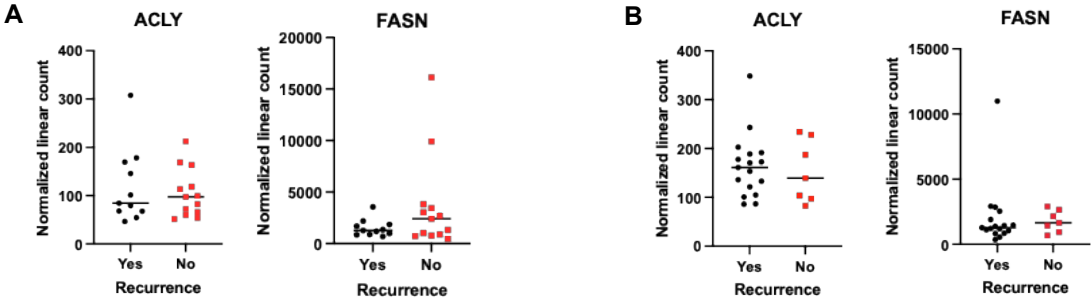

Supplement: Supplementary file 4 [file ed27fd72dbec4b741e6b7da2.pdf]
